# Supplementary material for: BCAA insufficiency leads to premature ovarian insufficiency via ceramide‐induced elevation of ROS
Source: PubMed Central journal article supplement (PMC10086587; doi:10.15252/emmm.202317450), 2023-02-27
Supplement: EMMM-15-e17450-s017.pdf [file EMMM-15-e17450-s017.pdf]

## Expanded View Figures

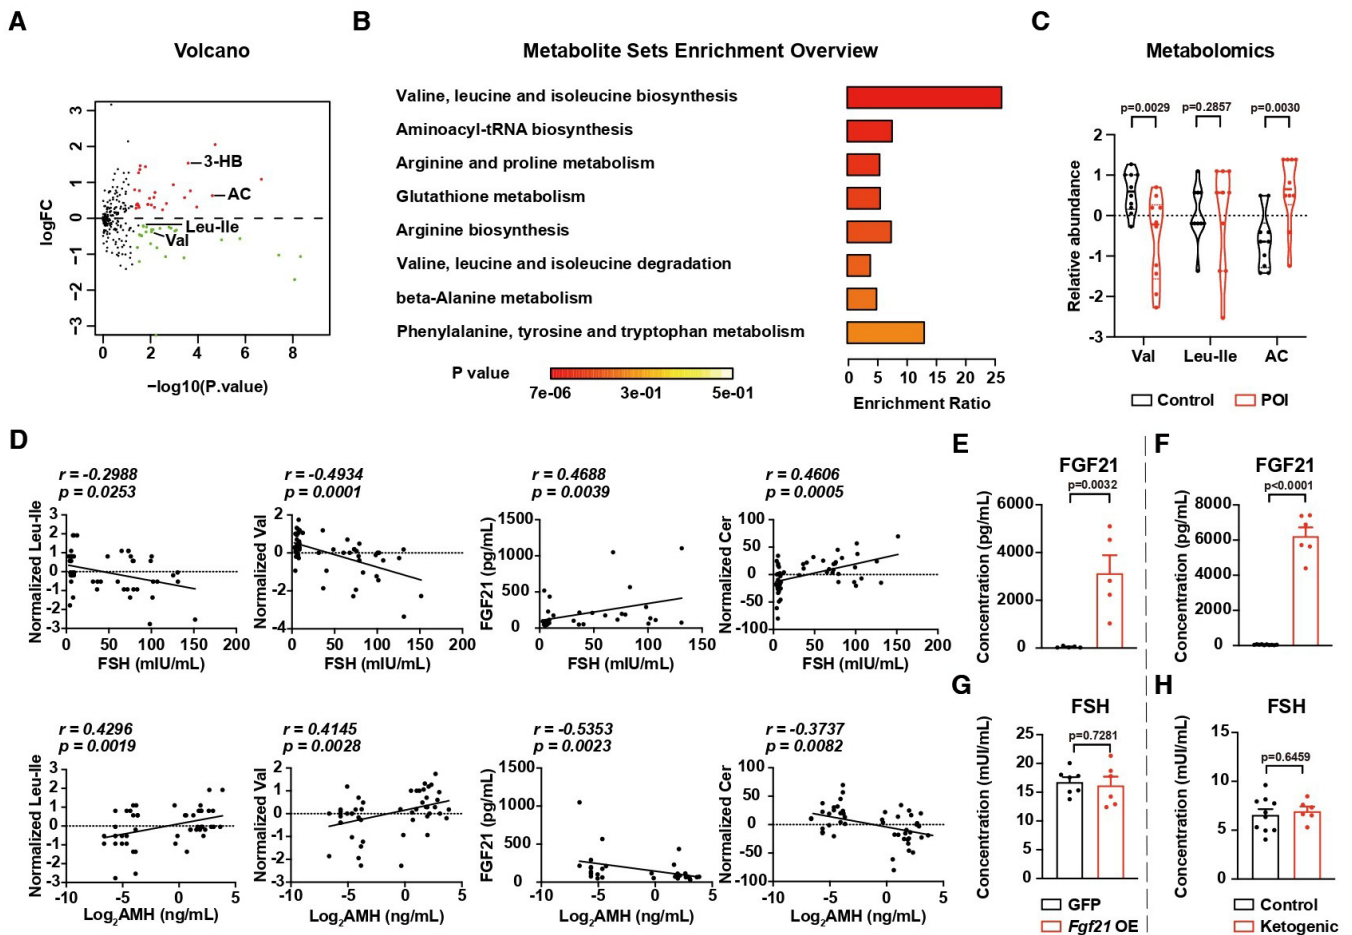

**Figure EV1. Metabolic details of POI patients.**

**A** Volcano plot showing the fold-change and *P*-value of metabolites. *N* = 18.

**B** Enrichment score and *P*-value of metabolites downregulated in POI patients. *N* = 18.

**C** Relative abundance of valine (Val), acetyl-carnitine (AC) but not leucine-isoleucine (Leu-Ile) in the serum of the Shandong Cohort. *N* = 10; Truncated violin plot, central band stands for median, and dotted lines stand for the upper quartile or the lower quartile of the data.

**D** The correlations between metabolites/FGF21 and clinical parameters. The *P* and *r* were calculated by the nonparametric Spearman test. *N* = 56.

**E, F** The concentration of FGF21 in mouse serum. (**E**) *N* = 5; (**F**) Control *N* = 10; Ketogenic diet, *N* = 6.

**G, H** The concentration of FSH in mouse serum. (**G**) Control, *N* = 7; *Fgf21* OE, *N* = 6; and (**H**) control, *N* = 10; Ketogenic diet, *N* = 6.

Data information: Error bars stand for SEM. The *P*-value was calculated by a two-tailed *t*-test with 2-way ANOVA correction.

Source data are available online for this figure.

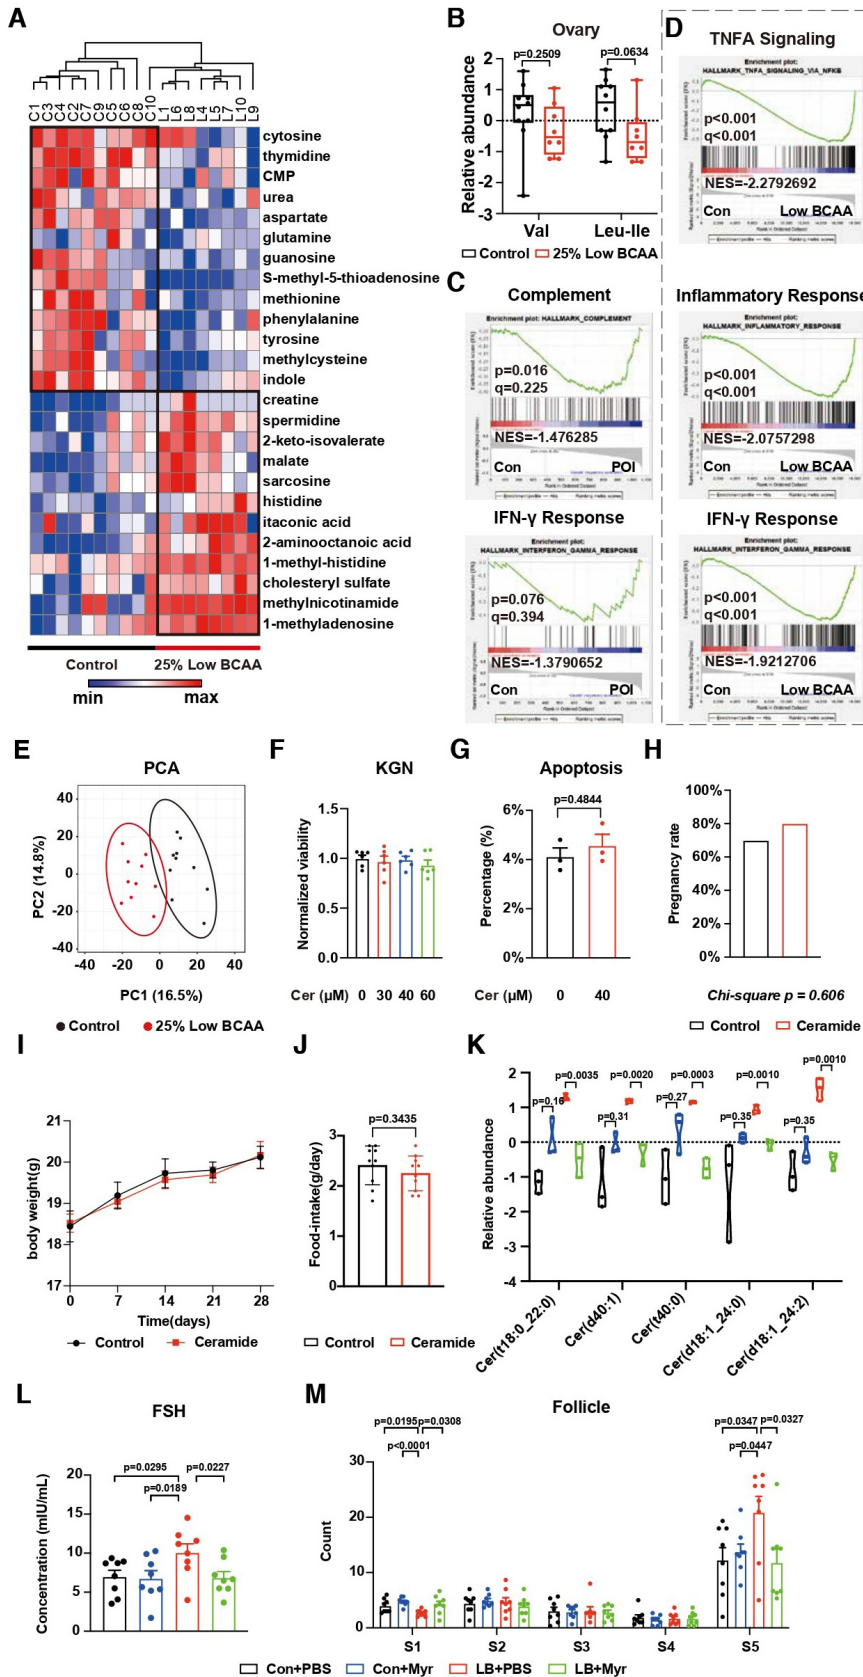

**Figure EV2. Lipid metabolism features of POI.**

- A Heatmap showing the top 25 differentially abundant metabolites in the ovaries of mice on a low BCAA diet. Control,  $N = 10$ ; low BCAA,  $N = 8$ .
- B The relative abundance of BCAA in the ovaries of mice on a low BCAA diet. Control,  $N = 10$ ; low BCAA,  $N = 8$ ; Boxplot, central band stands for median, boxes stand for 50% of the data, and whiskers stand for min or max of the data.
- C GSEA of the proteomics data in the serum of the Fudan Cohort.  $N = 11$ .
- D GSEA of RNA-seq data from the liver in the mice on a low BCAA diet or control diet.  $N = 6$ .
- E The PCA of serum from mice on a low BCAA diet or control diet.  $N = 10$ .
- F The relative cell viability of KGN cells with ceramide treatment.  $N = 6$ .
- G The percentage of Annexin V positive cells of KGN cells with ceramide treatment.  $N = 3$ .
- H-J The pregnancy rate, body weight, and food intake from mice with ceramide treatment.  $N = 10$ .
- K The relative abundance of ceramide in the serum of mice with myriocin treatment.  $N = 3$ ; Truncated violin plot, central band stands for median, and dotted lines stand for the upper quartile or the lower quartile of the data.
- L The serum concentration of FSH in mice with ceramide treatment.  $N = 8$ .
- M The changes in follicle count from mice with ceramide treatment.  $N = 8$ .

Data information: S1, Primordial; S2, Primary; S3, Secondary; S4, Antral; S5, Atretic. Error bars stand for SEM. The  $P$ -value was calculated by a two-tailed  $t$ -test with 2-way ANOVA correction. Source data are available online for this figure.

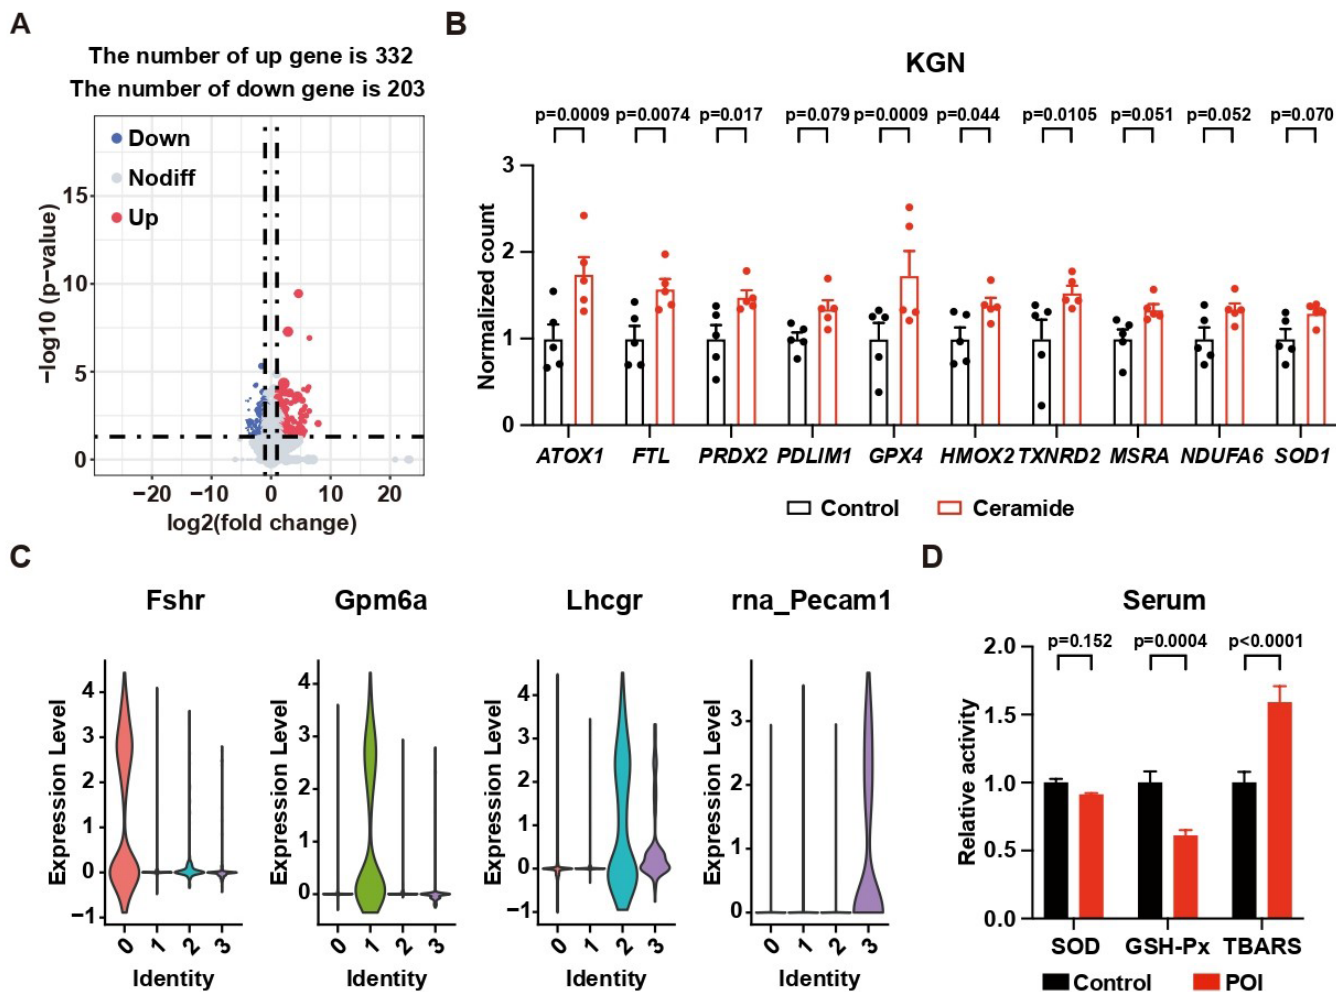

**Figure EV3. Low BCAA induces POI via elevation of ROS.**

A Genes with two-fold changes and  $P$ -value  $< 0.05$  are highlighted in the volcano plot.  $N = 5$ .

B Upregulation of ROS-related genes in KGN cells treated with ceramide.  $N = 5$ .

C Violin plots showing the expression of classical markers of nonimmune cells in ovaries from sNuc-seq data.

D Relative activity of ROS-related factors in patients. Control,  $N = 30$ ; POI,  $N = 60$ .

Data information: Error bars stand for SEM. The  $P$ -value was calculated by a two-tailed  $t$ -test with 2-way ANOVA correction.

Source data are available online for this figure.

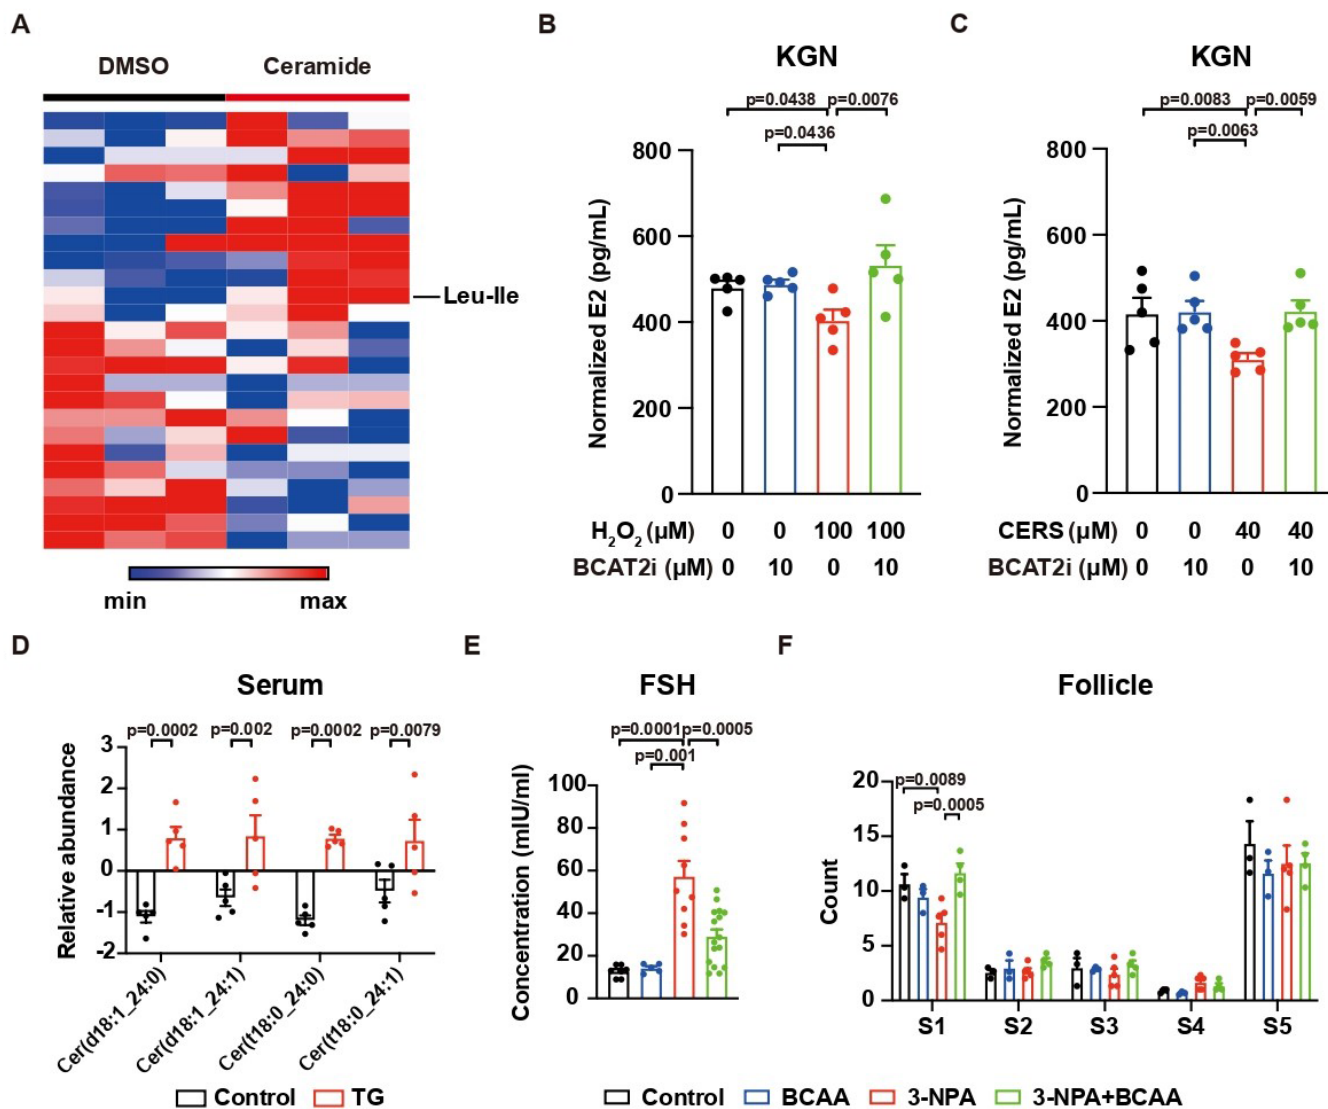

**Figure EV4. BCAA supplement protected the granulosa cells from ROS inducer.**

A Heatmap showing the relative abundance of metabolites in KGN cells treated with ceramides.  $N = 3$ .

B The concentration of E2 secreted by KGN cells with  $H_2O_2$  treatment w/o BCAT2 inhibitor.  $N = 5$ .

C The concentration of E2 secreted by KGN cells with ceramide treatment w/o BCAT2 inhibitor.  $N = 5$ .

D Elevation of ceramide in the serum of TG-treated mice.  $N = 5$ .

E BCAA supplement prevented the elevation of FSH in mice with 3-NPA treatment. Control,  $N = 7$ ; BCAA,  $N = 5$ ; 3-NPA,  $N = 9$ ; 3-NPA + BCAA,  $N = 16$ .

F BCAA supplement rescued the decrease of primordial follicles in mice with 3-NPA treatment. Control,  $N = 3$ ; BCAA,  $N = 3$ ; 3-NPA,  $N = 5$ ; 3-NPA + BCAA,  $N = 4$ .

Data information: S1, Primordial; S2, Primary; S3, Secondary; S4, Antral; S5, Atretic. Error bars stand for SEM. The  $P$ -value was calculated by a two-tailed  $t$ -test with 2-way ANOVA correction.

Source data are available online for this figure.
